# Supplementary material for: Zinc sensors with lower binding affinities for cellular imaging
Source: Royal Society of Chemistry journal article supplement (doi:10.1039/c3dt33024a), 2013-01-01
Supplement: c3dt33024a.pdf [file c3dt33024a.pdf]

## Supplementary information

### Zinc Sensors with Lower Binding Affinities for Cellular Imaging

Jin Hoon Kim,<sup>a</sup> In Hong Hwang,<sup>a</sup> Seung Pyo Jang,<sup>a,b</sup> Juhye Kang,<sup>a</sup> Sumi Kim,<sup>c</sup> Insup Noh,<sup>c</sup> Youngmee Kim,<sup>d</sup> Cheal Kim,<sup>a,\*</sup> Roger G. Harrison<sup>b,\*</sup>

<sup>a</sup>*Department of Fine Chemistry, Seoul National University of Science & Technology, Seoul 139-743, Korea. Email: chealkim@seoultech.ac.kr.*

<sup>b</sup>*Department of Chemistry and Biochemistry, Brigham Young University, Provo, Utah, USA. Email: roger\_harrison@byu.edu*

<sup>c</sup>*Department of Chemical Engineering, Seoul National University of Science & Technology, Seoul 139-743, Korea.*

<sup>d</sup>*Department of Chemistry and Nano Science, Ewha Womans University, Seoul 120-750, Korea.*

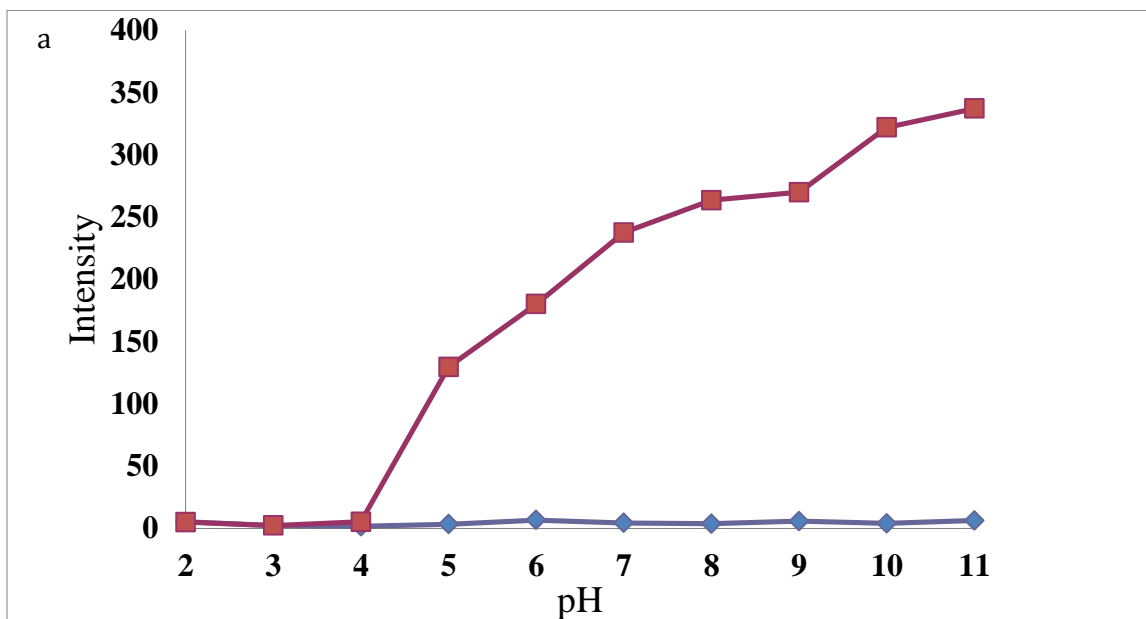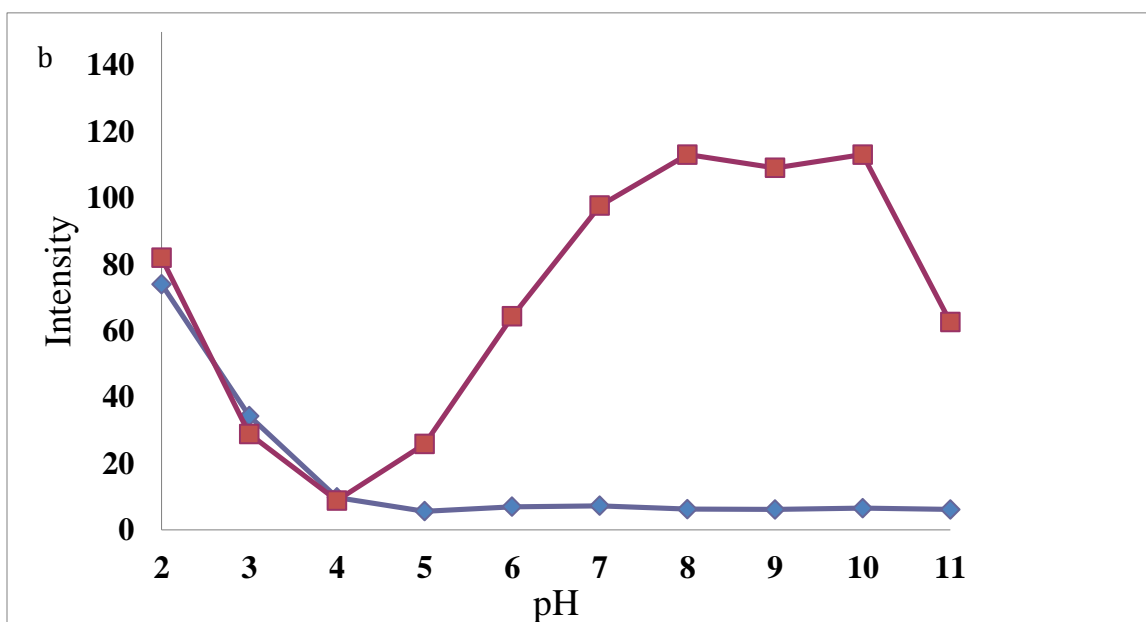

Figure S11. Emission intensity as a function of pH. a) **2,3-QA** without Zn<sup>2+</sup> (bottom) and with Zn<sup>2+</sup> (top). Excited at 350 nm. b) **2,3-QP** without Zn<sup>2+</sup> (bottom) and with Zn<sup>2+</sup> (top). Excited at 312 nm.

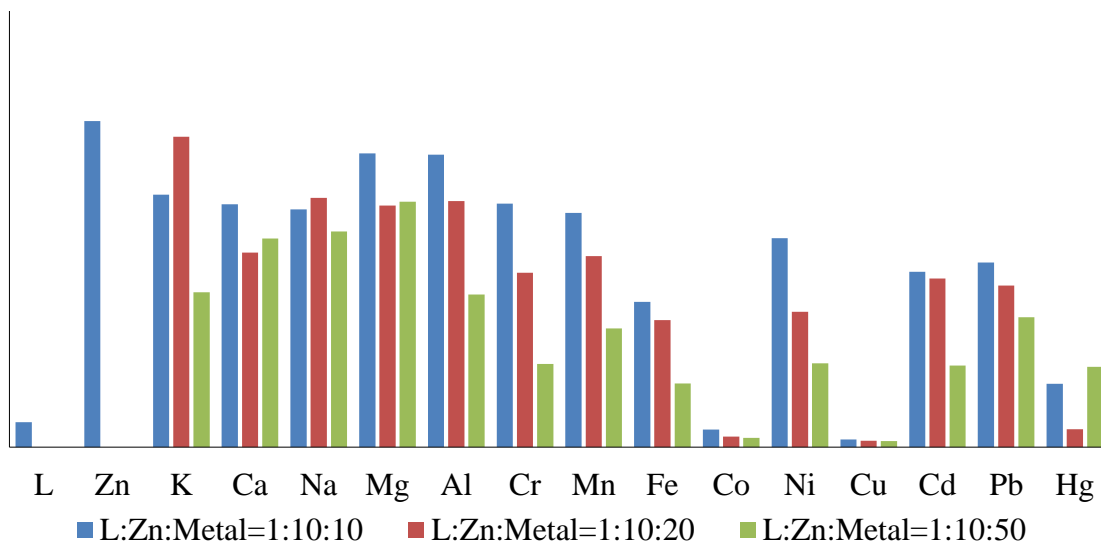

Figure SI2. Fluorescence change of the **2,3-QP-Zn<sup>2+</sup>** complex with other metal ions. Aqueous solutions of 5  $\mu\text{M}$  **2,3-QA** and 50  $\mu\text{M}$  **Zn<sup>2+</sup>** had metal ions added to them and excited at 312 nm. Their emission at 520 nm was monitored.

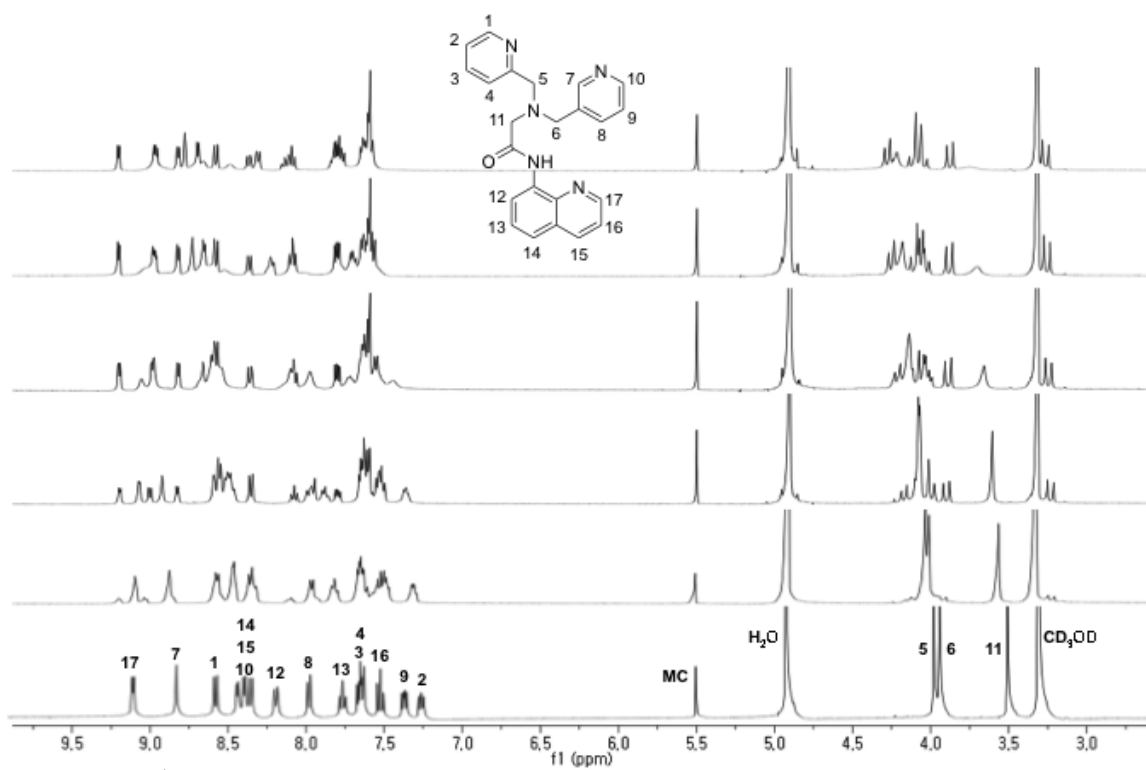

Figure SI3. <sup>1</sup>H NMR spectra of **2,3-QA** with different amounts of Zn(NO<sub>3</sub>)<sub>2</sub> in CD<sub>3</sub>OD. Equivalents of Zn<sup>2+</sup> going from the bottom spectra to the top: 0, 0.2, 0.4, 0.6, 0.8, 1.0.

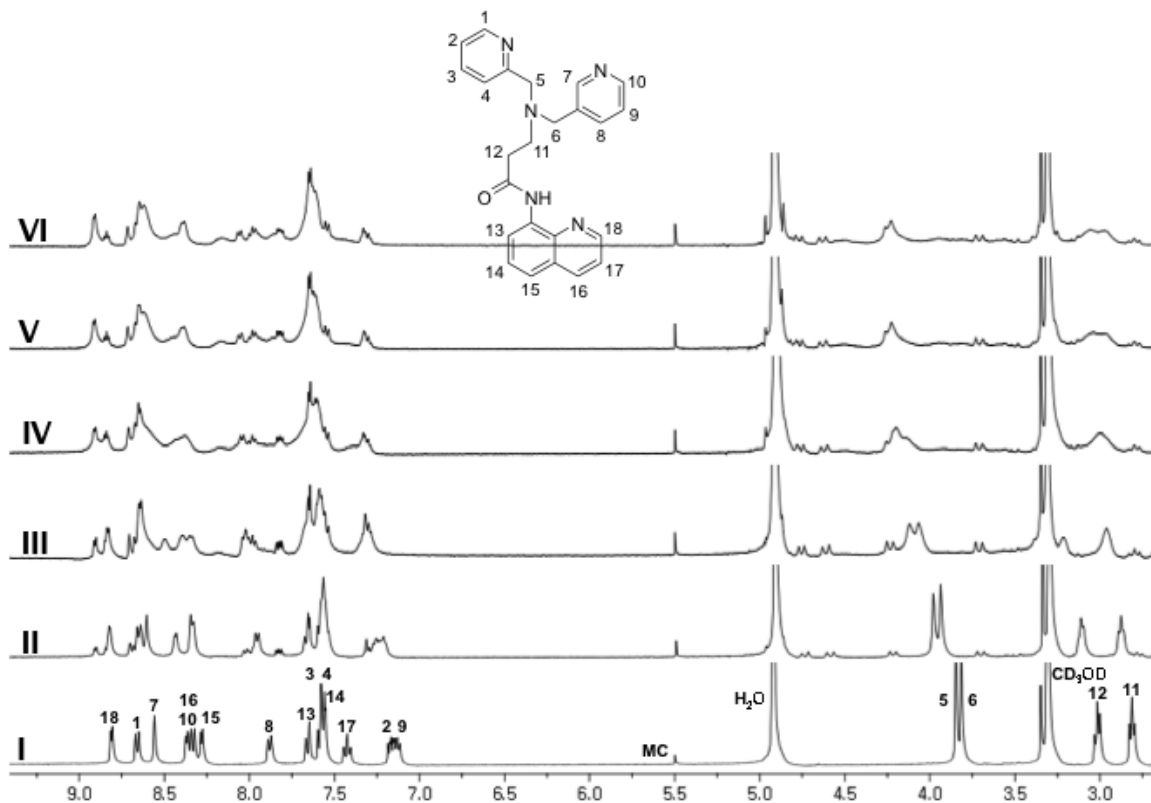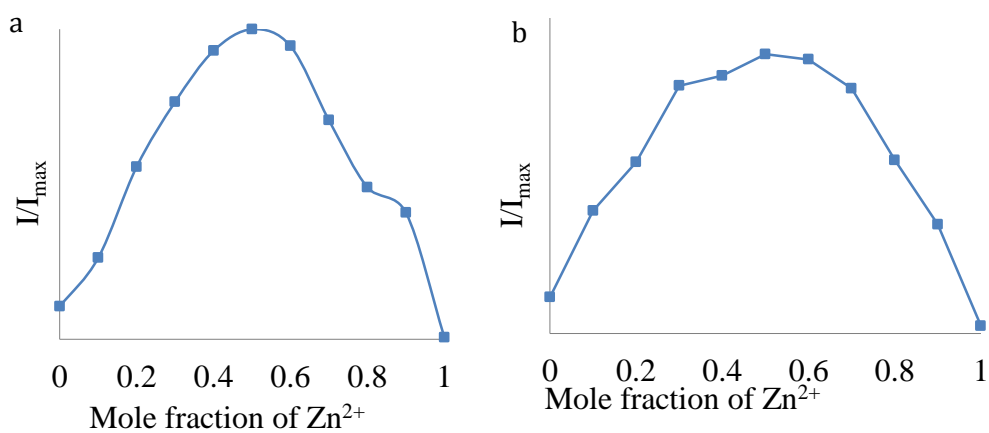

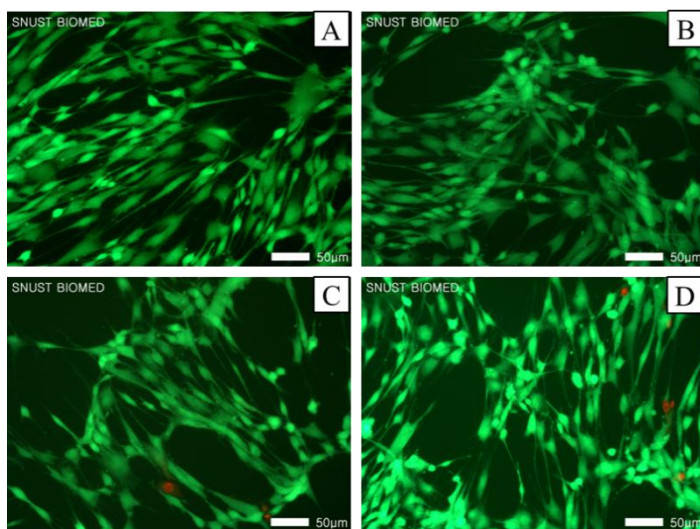

Figure SI6. Live/dead assay of fibroblasts. Control cells (A) and the cells after their *in vitro* exposures to **2,3-QA** molecules at the concentrations of either 1 (B), 10 (C) or 100  $\mu\text{M}$  (D) for 30 min. The scale bars are 50  $\mu\text{m}$ . Red dots are dead cells.

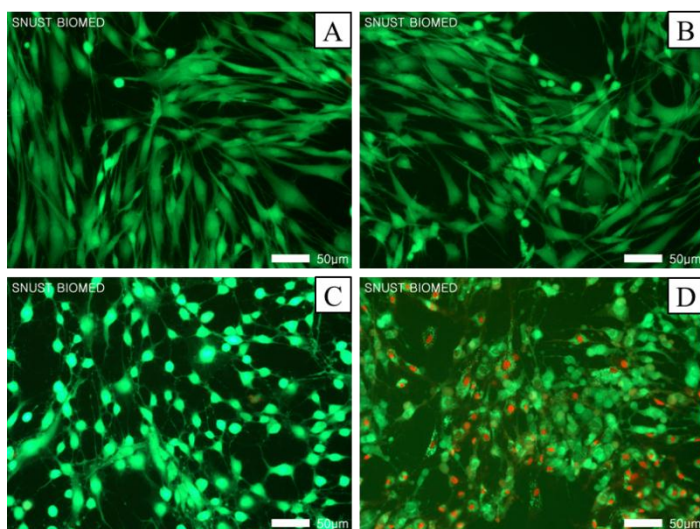

Figure SI7. Live/dead assay of fibroblasts. Control cells (A) and the cells after their *in vitro* exposures to the  $\text{Zn}(\text{NO}_3)_2$  molecules at the concentrations of either 1 (B): 10 (C): or 100.  $\mu\text{M}$  (D) for 4 hrs. Scale bars are 50  $\mu\text{m}$ . Red dots are dead cells.
